# Supplementary material
Source: PubMed Central journal article supplement (PMC6322543)
Supplement: NIHMS998486-supplement-Supplemental_Table.pdf [file NIHMS998486-supplement-Supplemental_Table.pdf]

Supplemental Table 1: Baseline demographics among mild ischemic stroke patients enrolled in study versus those excluded.

|                                           | Enrolled<br>(n=229) | Excluded<br>(n=16) | p<br>valu<br>e |
|-------------------------------------------|---------------------|--------------------|----------------|
| <b>Demographics</b>                       |                     |                    |                |
| Age (SD), y                               | 64.9 (15.0)         | 62.5 (20.6)        | 0.47           |
| Male, n (%)                               | 126 (55.0%)         | 7 (43.8%)          | 0.27           |
| Black, n (%)                              | 68 (29.7%)          | 4 (25.0%)          | 0.47           |
| Private Insurance, n (%)                  | 84 (36.7%)          | 9 (56.3%)          | 0.10           |
| mRS score at baseline,<br>median (IQR)    | 0 (0-3)             | 0 (0-3)            | 0.38           |
| <b>Comorbid medical conditions, n (%)</b> |                     |                    |                |
| Diabetes mellitus                         | 53 (23.1%)          | 2 (12.5%)          | 0.26           |
| Hypercholesterolemia                      | 162 (70.7%)         | 13 (82.3%)         | 0.28           |
| Atrial fibrillation/Flutter               | 20 (8.7%)           | 2 (12.5%)          | 0.43           |
| Cardiac disease                           | 42 (18.3%)          | 3 (1.3%)           | 0.59           |
| Prior stroke                              | 40 (17.5%)          | 4 (25.0%)          | 0.32           |
| Chronic kidney disease                    | 15 (6.6%)           | 0 (0%)             | 0.35           |
| Hypertension                              | 172 (75.1%)         | 13 (81.2%)         | 0.42           |
| Peripheral artery disease                 | 14 (6.1%)           | 1 (6.3%)           | 0.65           |
| Smoking within past 6<br>months           | 44 (19.2%)          | 3 (18.8%)          | 0.63<br>2      |
| <b>Clinical characteristics</b>           |                     |                    |                |
| Initial NIHSS score, median<br>(IQR)      | 1 (0-5)             | 1 (0-5)            | 0.18           |
| TOAST subtype, n (%)                      |                     |                    | 0.43           |
| Cardioembolic                             | 44 (19.2%)          | 1 (6.3%)           |                |
| Large artery atherosclerosis              | 41 (17.9%)          | 4 (25.0%)          |                |

|                      |            |           |
|----------------------|------------|-----------|
| Small artery disease | 37 (16.2%) | 2 (12.5%) |
| Other                | 28 (12.2%) | 4 (25.0%) |
| Cryptogenic          | 79 (34.5%) | 5 (31.3%) |

Abbreviations: SD - standard deviation, IQR - interquartile range, mRS - modified Rankin Score, NIHSS – National Institutes of Health Stroke Scale, TOAST - Trial of Org 10172 in Acute Stroke Treatment
